# Supplementary material
Source: PubMed Central journal article supplement (PMC2838547)
Supplement: 00958.2009_2.pdf [file 00958.2009_2.pdf]

quenching

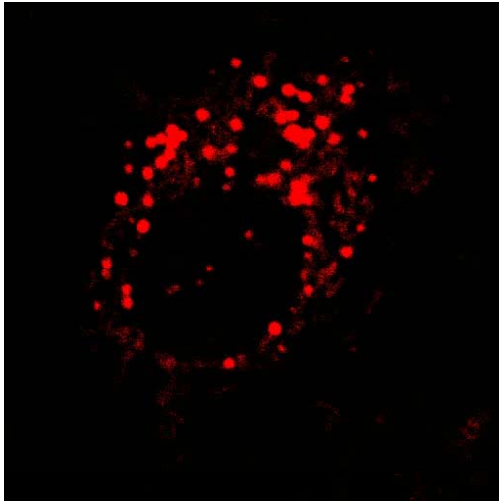

movie 1

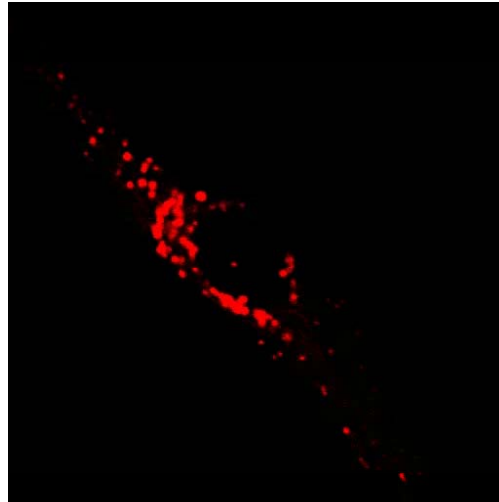

movie 2

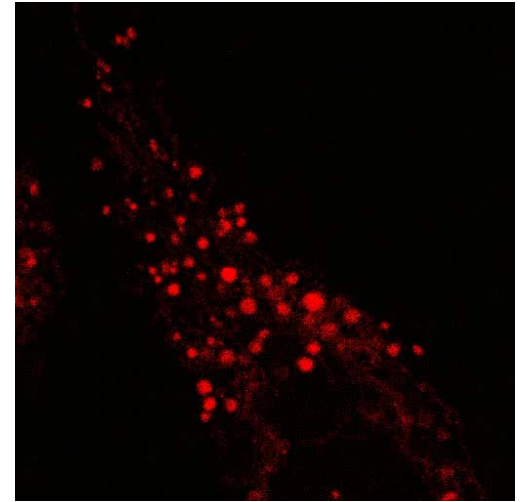

movie 3

dequenching

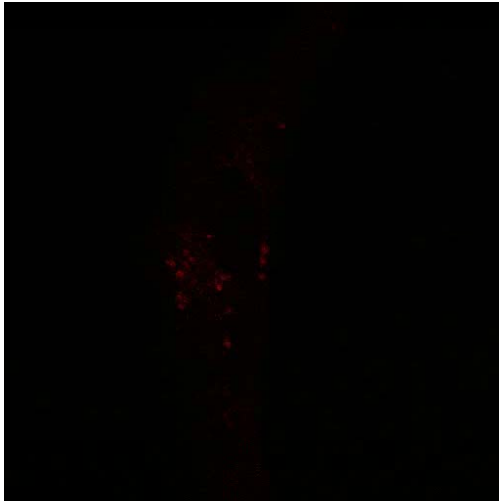

movie 4

**Supplementary data:** Quenching in FM1-43 fluorescence after FasL (movie 1), PI (movie 2) and Ars (movie 3) stimulation and dequenching in FM1-43 fluorescence after PI stimulation (movie 4).
